# Supplementary material for: X-ray structure of human aldo–keto reductase 1C3 in complex with a bile acid fused tetrazole inhibitor: experimental validation, molecular docking and structural analysis
Source: Royal Society of Chemistry journal article supplement (doi:10.1039/d2md00387b), 2022-12-01
Supplement: d2md00387b1.pdf [file d2md00387b1.pdf]

|               |     | 10          | 20         | 30        | 40        | 50             |                               |
|---------------|-----|-------------|------------|-----------|-----------|----------------|-------------------------------|
| <b>AKR1C2</b> | 1   | MDSKYQCVKLN | DGHFMPVLG  | FGTYAPAEV | PKSKALEAV | KLAIEAGFH      | HIDSAHVYNNEEQ 60              |
|               |     | MDSK+QCVKLN | DGHFMPVLG  | FGTYAP    | EVP+SKALE | KLAIEAGF       | HIDSAH+YNNEEQ                 |
| <b>AKR1C3</b> | 1   | MDSKHQCVKLN | DGHFMPVLG  | FGTYAPPEV | PRSKALEVT | KLAIEAGFR      | HIDSAHLYNNEEQ 60              |
| <b>AKR1C2</b> | 61  | VGLAIRSKIAD | GSVKREDIF  | YTSKLSNS  | HRPELVRPA | LERSLKNLQ      | LDYVDLYLIHFPV 120             |
|               |     | VGLAIRSKIAD | GSVKREDIF  | YTSKLS    | HRPELVRPA | LE SLK         | QLDYVDLYLIH P+                |
| <b>AKR1C3</b> | 61  | VGLAIRSKIAD | GSVKREDIF  | YTSKLSW   | STFHRPEL  | VRPALENSL      | KKQAQLDYVDLYLIHSPM 120        |
| <b>AKR1C2</b> | 121 | SVKPGEEV    | I          | PKDENGKIL | FDTVDLCAT | WEAMEKCK       | DAGLAKSIGVSNFNHRLLEMILNKP 180 |
|               |     | S+KPGEE+ P  | DENGK++FD  | VDLC      | TWEAMEKCK | DAGLAKSIGVSNFN | R LEMILNKP                    |
| <b>AKR1C3</b> | 121 | SLKPGEE     | LS         | PTDENGK   | VIFDIVDLC | TTWEAMEKCK     | DAGLAKSIGVSNFNRRQLEMILNKP 180 |
| <b>AKR1C2</b> | 181 | GLKYKPCVN   | QVECHPYFN  | RQKLLDF   | CKSKDIVLV | VAYSALGSH      | REEPWVDPNSPVLLEDPV 240        |
|               |     | GLKYKPCVN   | QVECHPYFN+ | KLLDF     | CKSKDIVLV | VAYSALGS       | R++ WVDPNSPVLLEDPV            |
| <b>AKR1C3</b> | 181 | GLKYKPCVN   | QVECHPYFN  | RSKLLDF   | CKSKDIVLV | VAYSALGS       | QRDKRWVDPNSPVLLEDPV 240       |
| <b>AKR1C2</b> | 241 | LCALAKKHK   | RTPALIAL   | RYQLQRG   | VVVLAKSY  | NEQRIRQ        | NVQVFEFQLTSEEMKAIDGLN 300     |
|               |     | LCALAKKHK   | RTPALIAL   | RYQLQRG   | VVVLAKSY  | NEQRIRQ        | NVQVFEFQLT+E+MKAIDGL+         |
| <b>AKR1C3</b> | 241 | LCALAKKHK   | RTPALIAL   | RYQLQRG   | VVVLAKSY  | NEQRIRQ        | NVQVFEFQLTAEDMKAIDGLD 300     |
| <b>AKR1C2</b> | 301 | RNVRYLT     | LDI        | FAGPPNYP  | SDEY      |                | 323                           |
|               |     | RN+ Y       | D          | FA        | PNYP+SDEY |                |                               |
| <b>AKR1C3</b> | 301 | RNLHY       | FNS        | DSF       | AASHPNYP  | SDEY           | 323                           |

**Supplemental.** Sequence alignment of human AKR1C2 and AKR1C3 using the 'align two or more sequences' feature of protein BLAST (<https://blast.ncbi.nlm.nih.gov>). AKR1C3 shares 91% sequence similarity and 87% identity with AKR1C2. Identical residues are shown in the consensus sequence between the two compared sequences. Similar residues are marked with a '+'. Residues in contact with compound **2** in the structure of **AKR1C3·NADP+·2** are shown in bold and highlighted in yellow. Of these 11 residues, 3 residues that are different in AKR1C2 are shown in red and highlighted in yellow.
